# Supplementary material
Source: Elsevier journal article supplement (https://www.sciencedirect.com/science/article/pii/S0214460322000146)
Supplement: mmc2 [file S0214460322000146:mmc2.doc]

**Anexo I**

| **Nivel macroestructural** | Descripción | Puntuación |
| --- | --- | --- |
| Contenido narrativo (CN) | Mide el nivel de detalle de la narración. Se da un punto por la referencia a cada uno de los 15 episodios de la historia más un punto por información adicional. | 0 – 16 |
| Estructura narrativa (EN) | Mide la organización global del contenido de la historia. Se califica de 0 a 2 puntos según el nivel de detalle de la inclusión de los elementos clave: orientación, dos acciones que se complican, clímax y resolución. Se otorga un punto adicional por la evaluación (puntos de vista o reacciones) y otro punto por la secuencia narrativa correcta. | 0 – 12 |
| **Nivel microestructural** |  |  |
| Mecanismos de Cohesión   - Cohesión referencial | Mide la adecuada primera introducción de personajes de la historia y el mantenimiento de referencias claras. Se califica de 0 a 2 puntos cada ítem. | 0 – 4 |
| - Conjunciones/ Conectores | Mide la utilización de variedad de conjunciones básicas de coordinación (0 a 1 puntos), la utilización de variedad marcadores discursivos (0 a 1 puntos) y la utilización de conectores de subordinación (0 a 3 puntos). | 0 – 5 |
| Mecanismos de  Evaluación (ME) | Mide la inclusión de cada uno de los siguientes elementos: intensificadores o desintensificadores, adjetivos, adverbios de modo o manera, estilo directo y estilo indirecto. Se da un punto por la producción de cada uno de los elementos. | 0 – 5 |
| Gramática (G) | Mide el uso correcto de artículos (0 a 1 puntos), uso correcto de pronombres (0 a 1 puntos), inclusión y uso correcto de preposiciones (0 a 1 puntos), concordancia correcta entre el verbo y el sujeto (0 a 2 puntos); concordancia correcta en género y número (0 a 2 puntos); uso correcto de oraciones en presente y pasado (0 a 2 puntos); inclusión y uso correcto de cadenas verbales (0 a 2 puntos); correlación verbal entre oración principal y oración subordinada (0 a 2 puntos); uso correcto de oraciones subordinadas de relativo (0 a 3 puntos). | 0 – 16 |
| **Preguntas de comprensión e inferencia** | Mide la comprensión e inferencia mediante tres preguntas para sondear la comprensión de las acciones e intenciones de los personajes. Se califica de 0 a 2 puntos cada pregunta. | 0 – 6 |
| **Puntuación total** |  | 0 - 64 |

*Resumen del sistema de puntuación de la adaptación al español del Test of Narrative Production*
