# Supplementary material
Source: Elsevier journal article supplement (https://www.sciencedirect.com/science/article/pii/S0214460322000146)
Supplement: mmc3 [file S0214460322000146:mmc3.doc]

**Anexo III**

*Ejemplo de la transcripción y puntuación de una narración*

| **Transcripción narración *** | **Puntuación resumida** |  |
| --- | --- | --- |
| *“Había una niña y un niño*  *y la niña llevó una comida*  *y luego el niño le dijo:*  *dámela, dámela*  *y entonces le daba*  *hasta que se cansó la niña*  *entonces se encontró una araña*  *entonces se lo metió en un bocata*  *y cuando se lo comió*  *se lo vio en la boca*  *y al final se fue corriendo el niño”.* | **Nivel Macro**  Contenido narrativo (CN)  Estructura Narrativa (EN)    **Nivel Micro**  Mecanismos de Cohesión (MC)   - Primera mención de los personajes (2) - Mantenimiento de referencias (1) - Utilización de variedad de conjunciones básicas de coordinación (0) - Utilización de variedad de marcadores discursivos (1) - Utilización de conectores de subordinación (1)   Mecanismos de Evaluación (ME)   - Intensificadores o desintensificadores (0) - Adjetivos(0) - Adverbios de modo o manera (0) - Estilo directo (1) - Estilo indirecto (0)   Gramática (G)   - Uso correcto de artículos (1) - Uso correcto de pronombres (1) - Inclusión y uso correcto de preposiciones (1) - Concordancia correcta entre el verbo y el sujeto (2) - Concordancia correcta en género y número (2) - Uso correcto de oraciones en presente y pasado (2) - Inclusión y uso correcto de cadenas verbales (0) - Correlación verbal correcta entre oración principal oración subordinada (2) - Uso correcto de oraciones subordinadas adjetivas o de relativo (0) | 8/16  9/12  5/9  1/5  11/16 |

* Narración producida por una niña de 7 años 4 meses.
